# Supplementary material
Source: Springer Nature journal article supplement (https://www.springermedizin.de/resource/supplementary/13229_2009_9_MOESM2_ESM.pdf/9676008)

IVS1+63G>A

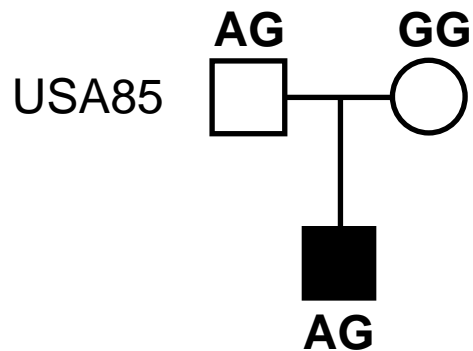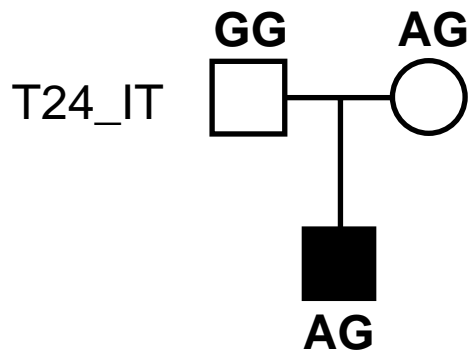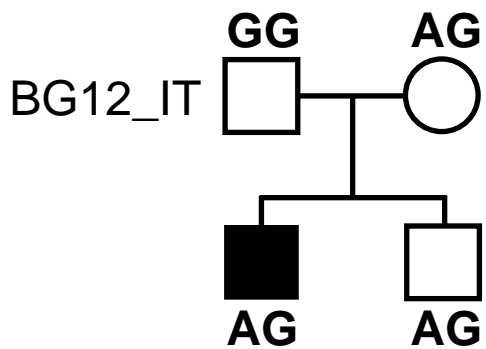

rs35115415  
[c.702G>A (V234V)]

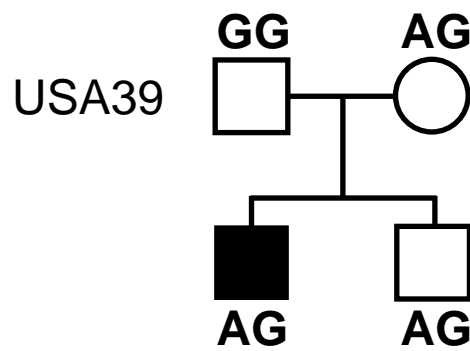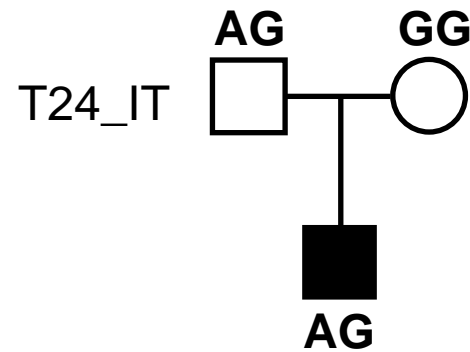

c.872\_873delinsAA  
(S291N)

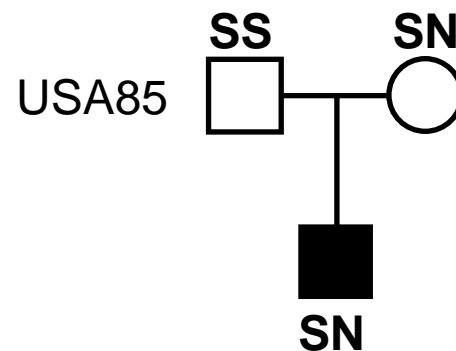

Supplement: MOESM2 [file 9676008]
